# Supplementary material
Source: publisher figshare collection journal article supplement (https://sage.figshare.com/ndownloader/files/14399357)
Supplement: Supplementary file 1 [file 14399357]

## **SUPPLEMENTARY MATERIAL**

### **EXPERIMENTAL**

#### ***Materials***

Crispa<sup>TM</sup> gold sunflower oil was obtained from Sime Darby Hudson & Knight (Boksburg, RSA). 98 wt% Acetic acid, 98 wt% formic acid, 99 wt% toluene and 80 wt% potassium hydroxide (KOH) were obtained from Associated Chemical Enterprises (Johannesburg, South Africa). The KOH was dried at 105 °C before use. 37 wt% HCl was obtained from Sigma-Aldrich (Kempton Park, South Africa).

#### ***Methods***

Crude glycerol preparation was reported previously.<sup>1</sup> In short: Sunflower oil transesterification with ethanol at a molar ratio of 6:1 (ethanol:oil), catalysed by KOH addition (1 wt% of oil), was conducted at 60 °C for 120 min under stirring at 100 rpm.<sup>2-4</sup> After reaction the product mixture was left to separate into biodiesel and glycerol rich layers for 24h.

Organosolv lignin extraction was conducted as previously reported:<sup>1</sup> Milled sugarcane bagasse was firstly dewaxed in toluene/ethanol (2:1, v/v) at 9 mL (g bagasse)<sup>-1</sup> for 6 h under reflux at 73 °C. Dried bagasse was extracted in formic acid/acetic acid/water (3:6:1, v/v/v) at 10 mL (g bagasse)<sup>-1</sup>, 85 °C for 4 h catalysed with HCl (0.1 wt% of bagasse). The filtrate volume was reduced in a rotary evaporator before hemicellulose was precipitated in three volumes 95 v% ethanol. The solvents were evaporated and the lignin precipitated in pH 2 water by centrifugation for 15 min at 4000 rpm.

#### ***THF size-exclusion chromatography (SEC)***

The SEC-MALLS analysis procedure used was described by Otto et al.<sup>5</sup> In short: The system consisted of an HPLC (Agilent 1100) with a MALLS detector (Wyatt Corp DAWN DSP photometer, Santa Barbara, CA) using a 5mW He-Ne laser set at 632.8 nm. The concentration was monitored by a RI detector (Agilent 1100 series). The column set consisted of a PLGel mixed bed type C column (7.6 mm x 300 mm, exclusion range 300–2,000,000 g mol<sup>-1</sup>, particle size of 5 µm) and a Phenogel column (Phenomenex, 7.8 mm x 300 mm, exclusion range > 5000 g mol<sup>-1</sup>, particle size of 5 µm). The eluent used was THF containing 250 ppm BHT as inhibitor. The flowrate was 1 mL min<sup>-1</sup>, system temperature was set at 30 °C and the injection volume was 100 µL. The dn/dc value was determined for each sample using the online method described by Lee and Chang.<sup>6</sup> Polystyrene ( $\overline{M}_w = 30000$  g mol<sup>-1</sup>, dispersity < 1.05) was used as standard.

Product samples were prepared by first derivatizing the material according to the method described by Guerra et al.<sup>7</sup> About 20 mg of sample was reacted with a mixture (0.25 mL mg<sup>-1</sup>) of acetic acid/acetyl bromide (92:8, v/v) for 2 h at 50 °C under constant stirring in a closed vial. Afterwards the solvent was removed in a rotary evaporator. THF was immediately added to yield a sample concentration of 2mg mL<sup>-1</sup>. Samples were stirred for 12 h and then left to stand a further 48h before the filtered samples (0.45 µm PALL Acrodisc GxF/GHP syringe filters) were analysed.

## RESULTS AND DISCUSSION

**Table S1: Crude glycerol composition.<sup>8</sup>**

| Constituent                    | wt%                   |
|--------------------------------|-----------------------|
| Fatty acid ethyl esters (FAEE) | 27.2±1.3 <sup>a</sup> |
| MAG                            | 9.6±1.3 <sup>b</sup>  |
| Diacylglycerol                 | 0.8 <sup>b</sup>      |
| Ethanol                        | 14.8±3.7 <sup>b</sup> |
| Glycerol                       | 25.3±0.5 <sup>b</sup> |

<sup>a</sup> Determined by GC. 95% Confidence interval based on triplicate analysis.

<sup>b</sup> Determined by <sup>31</sup>P NMR. Based on triplicate analysis.

**Table S2: Lignin characterisation<sup>8</sup>**

| Lignin | C                       | H         | N         | Ash (wt%) |
|--------|-------------------------|-----------|-----------|-----------|
| KL     | 51.7 ± 0.7 <sup>a</sup> | 3.7 ± 0.2 | 0.2 ± 0.0 | 20.2±0    |
| OL     | 57.7 ± 0.7              | 5.2 ± 0.0 | 0.8 ± 0.1 | 2.6±0.2   |
| LS     | 42.8 ± 0.1              | 4.0 ± 0.1 | 0.2 ± 0.0 | 16.7±0.4  |

<sup>a</sup>95% Confidence interval based on triplicate analysis.

**Table S3: PUF formulation.<sup>1</sup>**

| Reagent                | Parts (weight) |
|------------------------|----------------|
| Polyol                 | 100            |
| Gelling catalyst       | 0.86           |
| Blowing catalyst       | 0.67           |
| Surfactant             | 2.50           |
| Water                  | 1.25           |
| Isocyanate index (MDI) | 1.05           |

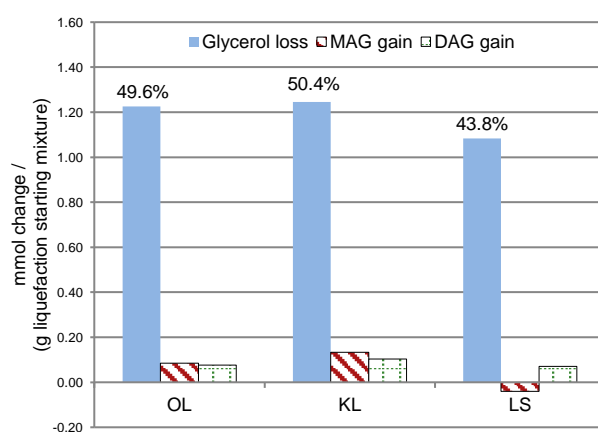

**Figure S1: Change in crude glycerol constituent contents during liquefaction of the respective lignins, determined with <sup>31</sup>P NMR spectroscopy.<sup>8</sup>**

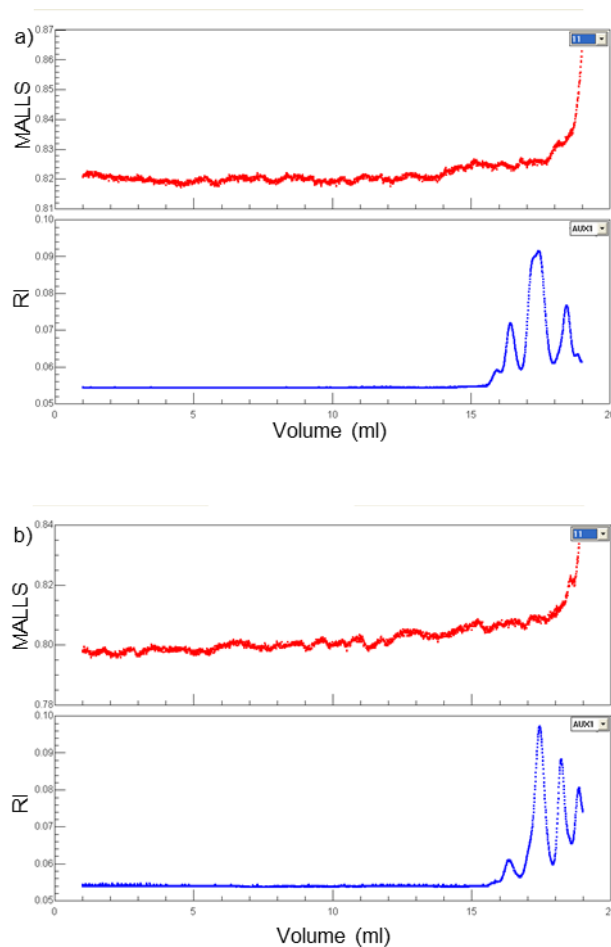

**Figure S2:** Liquid phase product elution profiles on the THF system: a) KL liquid product, b) LS liquid product (Peaks from 18 mL onwards are due to solvent effects, not attributable to the samples).

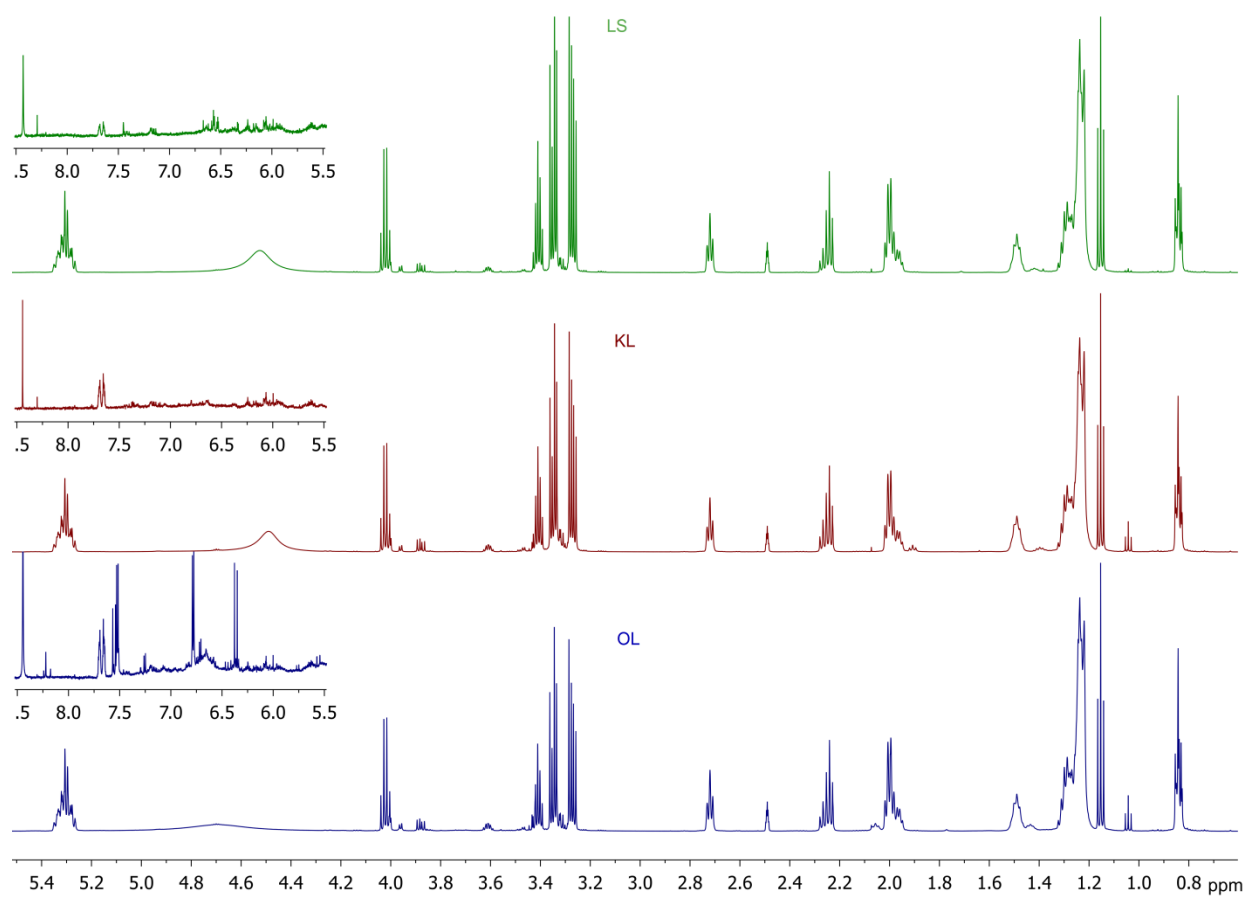

**Figure S3:**  $^1\text{H}$  NMR spectra of liquid phase products.<sup>8</sup>

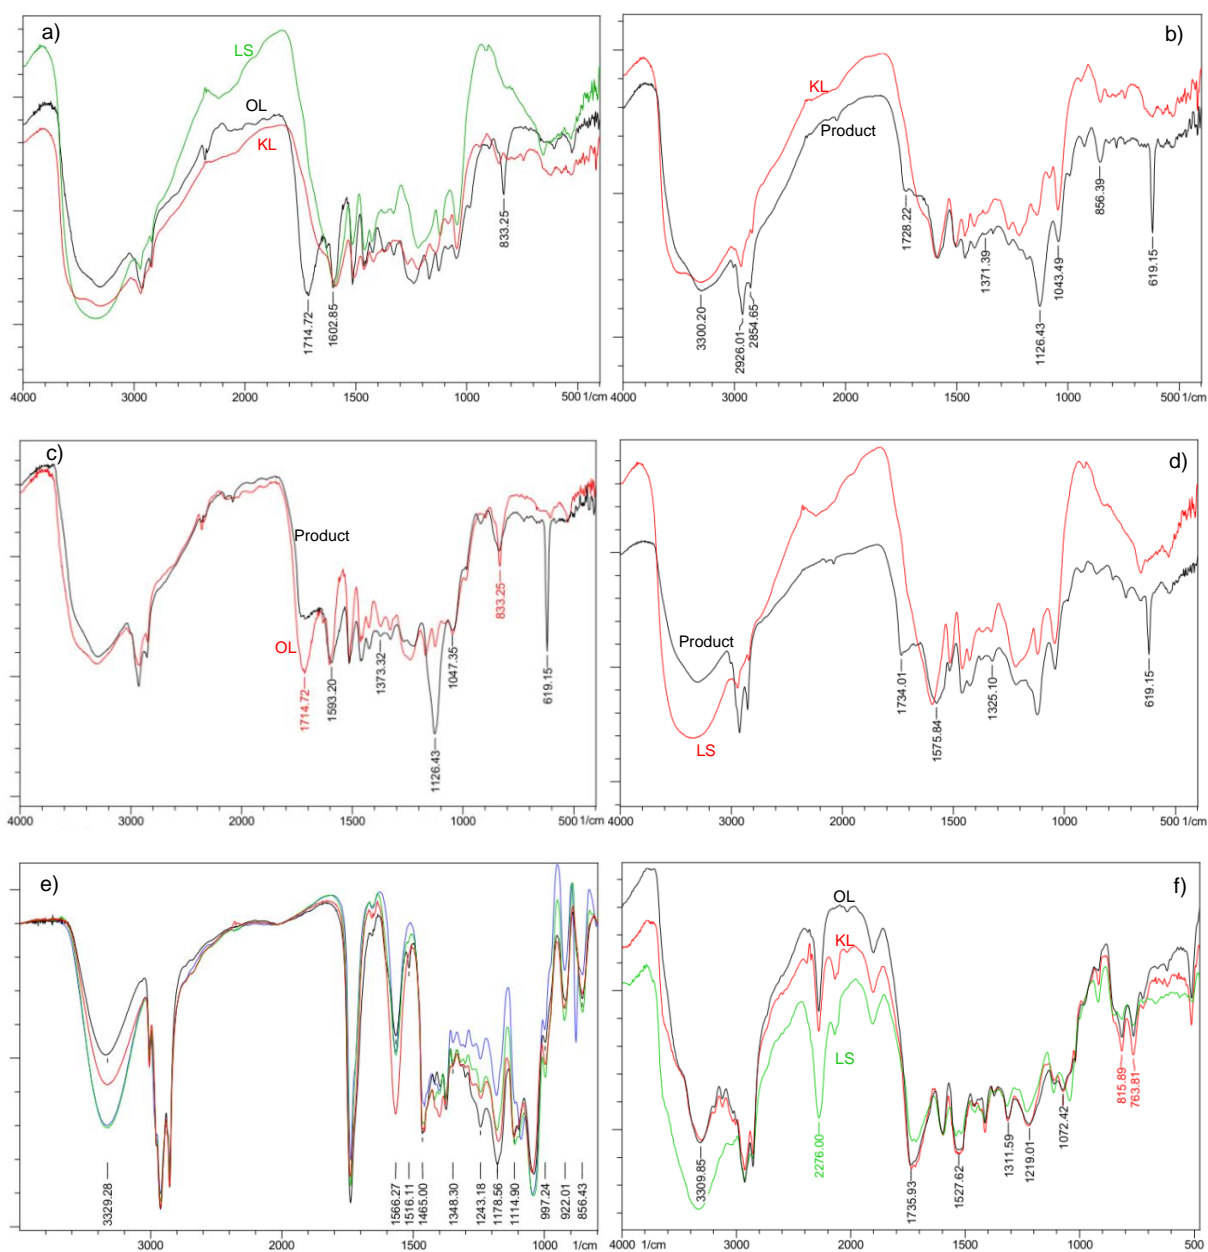

**Figure S4:** FTIR spectra: a) Lignin, b) KL and solid product, c) OL and solid product, d) LS and solid product, e) Crude glycerol and liquid products (black-OL, red-KL, green-LS, blue-crude glycerol), f) Polyurethanes.

## References

1. Muller, L.; Marx, S.; Chiyanzu, I.; Vosloo, H., Preparation of polyurethane from lignin and crude glycerol. In *Setting the Course for a Biobased Economy, Proceedings of the 23rd European Biomass Conference*, Obernberger, I.; Baxter, D.; Grassi, A.; Helm, P., Eds. ETA-Florence Renewable Energies: Vienna, 2015; pp 1070-1074.
2. Brunschwig, C.; Moussavou, W.; Blin, J., Use of bioethanol for biodiesel production. *Prog. Energy Combust. Sci.* **2012**, *38* (2), 283-301.
3. Soares, C. M.; Itavo, L. C. V.; Dias, A. M.; Arruda, E. J.; Delben, A. A. S. T.; Oliveira, S. L.; de Oliveira, L. C. S., Forage turnip, sunflower, and soybean biodiesel obtained by ethanol synthesis: Production protocols and thermal behavior. *Fuel* **2010**, *89* (12), 3725-3729.
4. Cernoch, M.; Hajek, M.; Skopal, F., Ethanolysis of rapeseed oil - Distribution of ethyl esters, glycerides and glycerol between ester and glycerol phases. *Bioresour. Technol.* **2010**, *101* (7), 2071-2075.
5. Otto, D. P.; Vosloo, H. C. M.; Liebenberg, W.; de Villiers, M. M., Effects of the cosurfactant 1-butanol and feed composition on nanoparticle properties produced by microemulsion copolymerization of styrene and methyl methacrylate. *J. Appl. Polym. Sci.* **2008**, *107* (6), 3950-3962.
6. Lee, H. C.; Chang, T. H., Online Determination of Dn/Dc for Size-Exclusion Chromatography Coupled with a Light-Scattering Detector. *Bull. Korean Chem. Soc.* **1995**, *16* (7), 640-643.
7. Guerra, A.; Filpponen, I.; Lucia, L. A.; Saquing, C.; Baumberger, S.; Argyropoulos, D. S., Toward a better understanding of the lignin isolation process from wood. *J. Agric. Food. Chem.* **2006**, *54* (16), 5939-5947.
8. Muller, L. C.; Marx, S.; Vosloo, H. C. M., Polyol preparation by liquefaction of technical lignins in crude glycerol. *J. Renewable Mater.* **2017**, *5* (1), 67-80.
